# Supplementary material
Source: PubMed Central journal article supplement (PMC6641997)
Supplement: NIHMS1527169-supplement-1.pdf [file NIHMS1527169-supplement-1.pdf]

## Effects of L-DOPA Monotherapy on Psychomotor Speed and [<sup>11</sup>C]Raclopride Binding in High Risk Depressed Older Adults

### *Supplemental Information*

Table S1. Practice effects on processing and gait speed outcome measures between screening visit and Week 0.

|                              | Mean change<br>± SE<br>Screening to<br>Week 0 | Mean change<br>95% CI<br>Screening to<br>Week 0 | ES±SE     | ES 95% CI  | P-value |
|------------------------------|-----------------------------------------------|-------------------------------------------------|-----------|------------|---------|
| Digit symbol                 | 5.33±0.97                                     | 3.43,7.23                                       | 0.55±0.1  | 0.35,0.75  | <.0001  |
| Pattern comparison           | 0.67±0.61                                     | -0.52,1.86                                      | 0.12±0.11 | -0.1,0.34  | 0.2723  |
| Letter comparison            | 0.64±0.5                                      | -0.34,1.61                                      | 0.13±0.11 | -0.07,0.34 | 0.1987  |
| Processing factor            | 1.96±0.61                                     | 0.77,3.15                                       | 0.28±0.09 | 0.11,0.45  | 0.0012  |
| Single task gait speed       | 0.08±0.02                                     | 0.03,0.13                                       | 0.46±0.14 | 0.18,0.73  | 0.001   |
| Dual task gait speed fluency | 0.04±0.02                                     | 0,0.09                                          | 0.19±0.11 | -0.01,0.4  | 0.0645  |

ES = effect size, SE = standard error, CI = confidence interval.

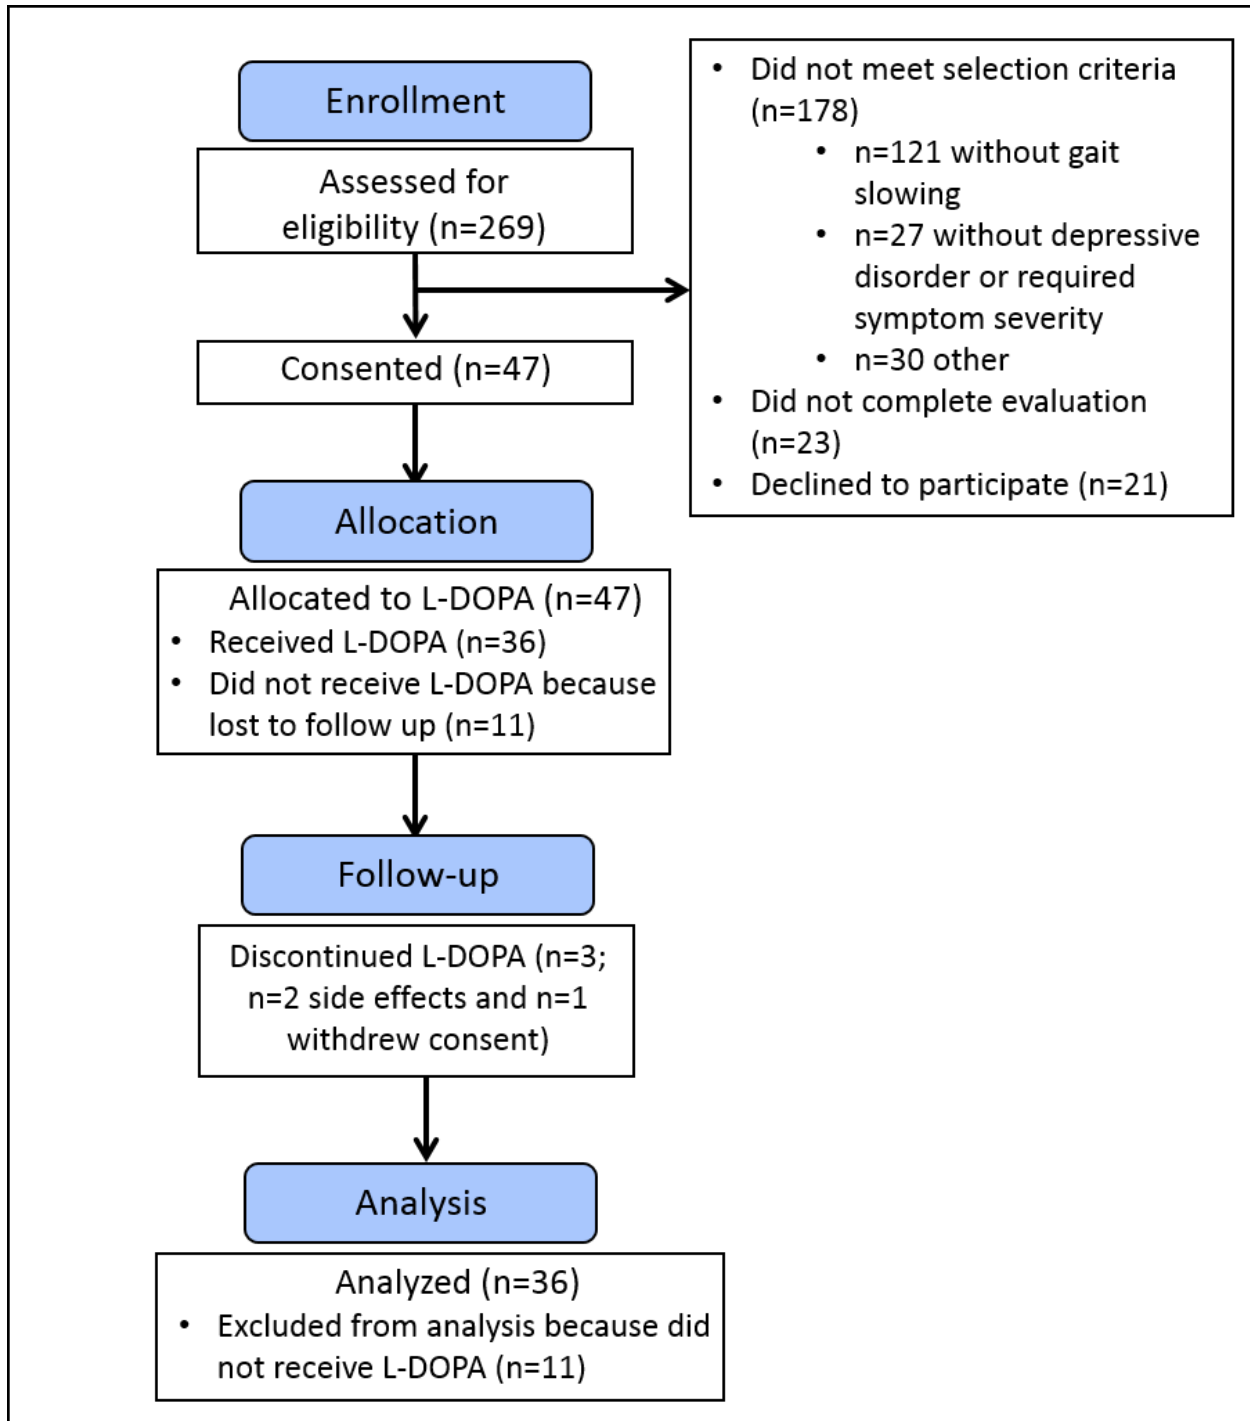

Figure S1. CONSORT flow diagram.

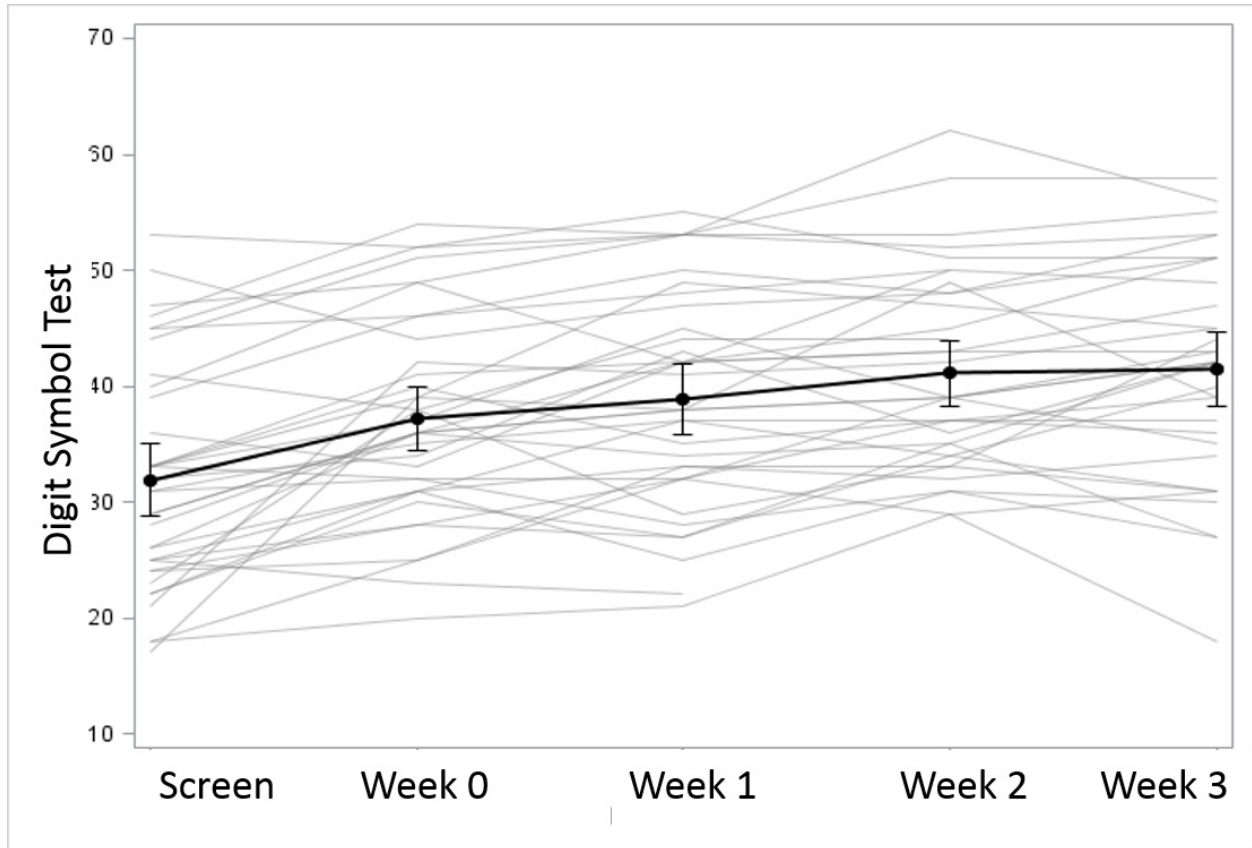

Figure S2. Mean estimates with 95% confidence intervals and spaghetti plots for Digit Symbol measure. Values on Digit Symbol increased by study week from Screen ( $31.9 \pm 9.7$ ) to Week 0 ( $37.2 \pm 8.7$ ), Week 1 ( $38.9 \pm 9.4$ ), Week 2 ( $41.1 \pm 8.5$ ), and Week 3 ( $41.4 \pm 9.6$ ).

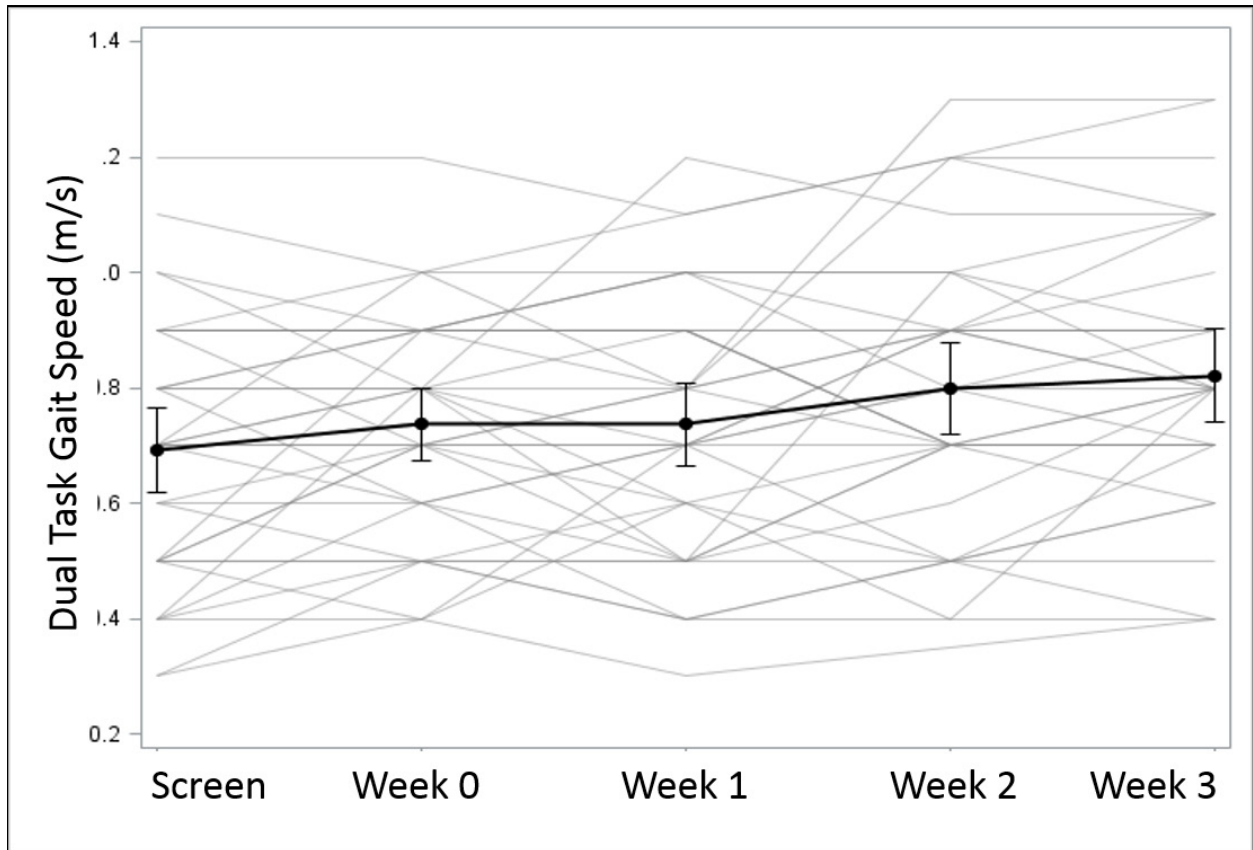

Figure S3. Mean estimates with 95% confidence intervals and spaghetti plots for dual task gait speed measure. Dual task gait speed values increased by study week from Screen ( $0.69 \pm 0.23$ ) to Week 0 ( $0.74 \pm 0.20$ ), Week 1 ( $0.74 \pm 0.23$ ), Week 2 ( $0.80 \pm 0.24$ ), and Week 3 ( $0.82 \pm 0.24$ ).
